# Supplementary material for: Electrochemically driven optical and SERS immunosensor for the detection of a therapeutic cardiac drug
Source: Royal Society of Chemistry journal article supplement (doi:10.1039/d1ra07680a), 2022-01-01
Supplement: d1ra07680a1.pdf [file d1ra07680a1.pdf]

## Electrochemically driven optical and SERs immunosensor for the detection of therapeutic cardiac drug

Madeeha Chaudhry<sup>2,7</sup>, Dong-Kwon Lim<sup>3</sup>, Jeon Woong Kang<sup>4</sup>, Zahid Yaqoob<sup>4</sup>, Peter So<sup>4,5,6</sup>, M Fahad Bhopal<sup>2</sup>, Minqiang Wang<sup>8</sup>, Raheel Qamar<sup>1</sup>, Arshad Saleem Bhatti<sup>2\*</sup>.

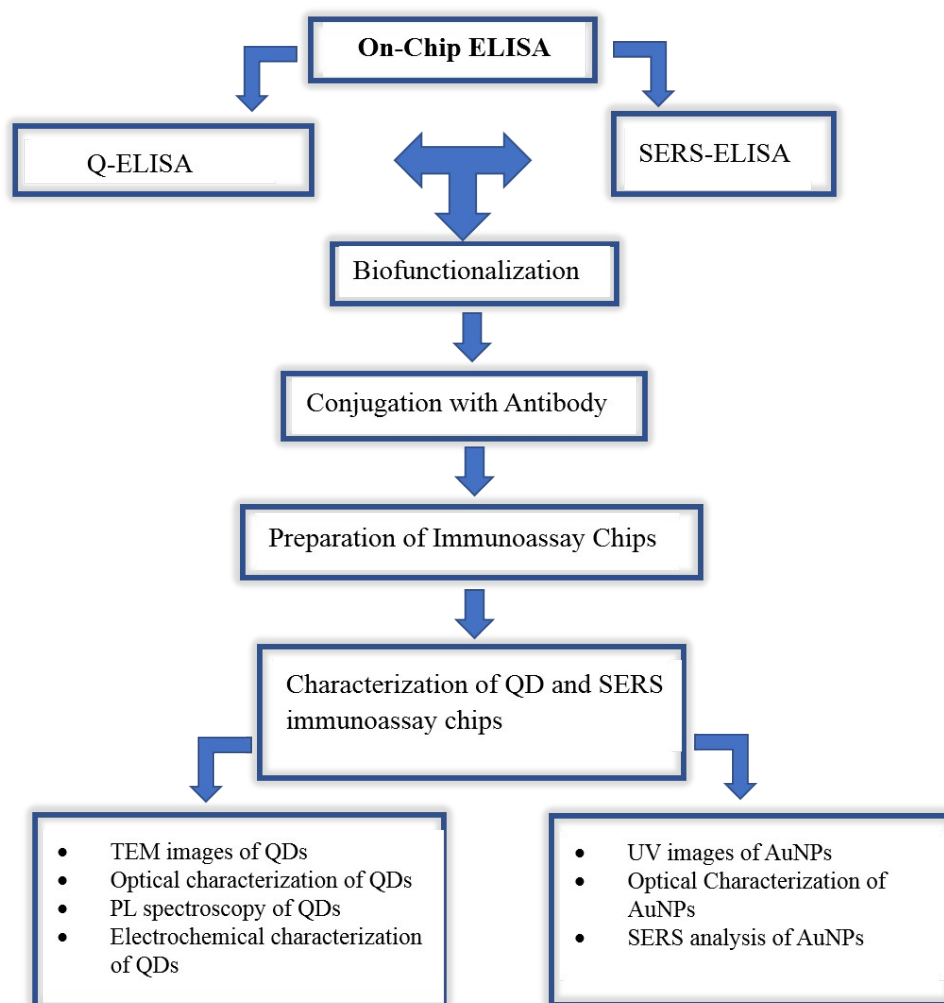

**Fig.S1.** Flow chart showing the experimental scheme of Q-ELISA and SERS-ELISA.

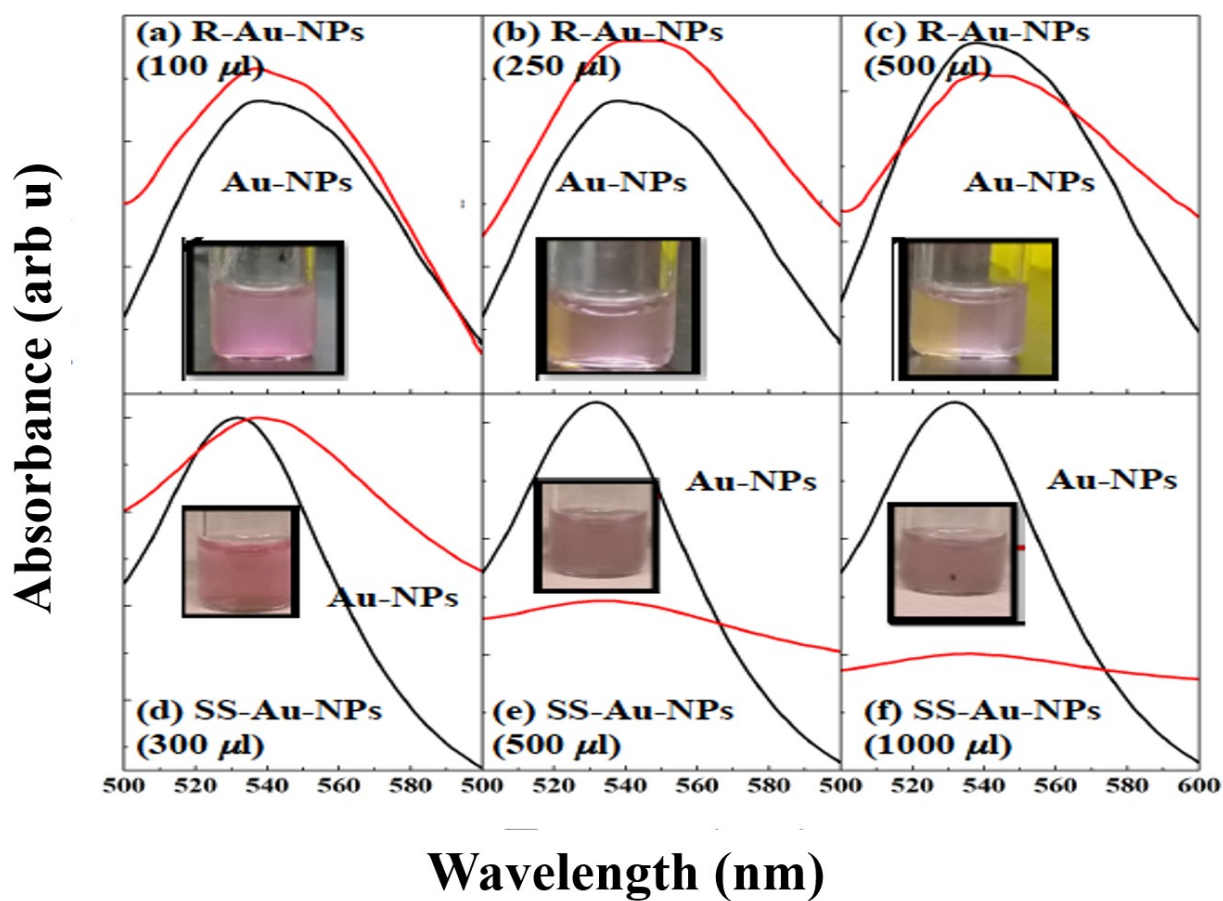

**Fig. S2.** UV-/Vis spectra of three different volumes of Raman reporter (R): **a** (100  $\mu\text{L}$ ), **b** (250  $\mu\text{L}$ ), **c** (500  $\mu\text{L}$ ); UV-VIS spectra of different quantities of sodium silicate (SS), **d** (300  $\mu\text{L}$ ), **e** (500  $\mu\text{L}$ ), **f** (1000  $\mu\text{L}$ ).

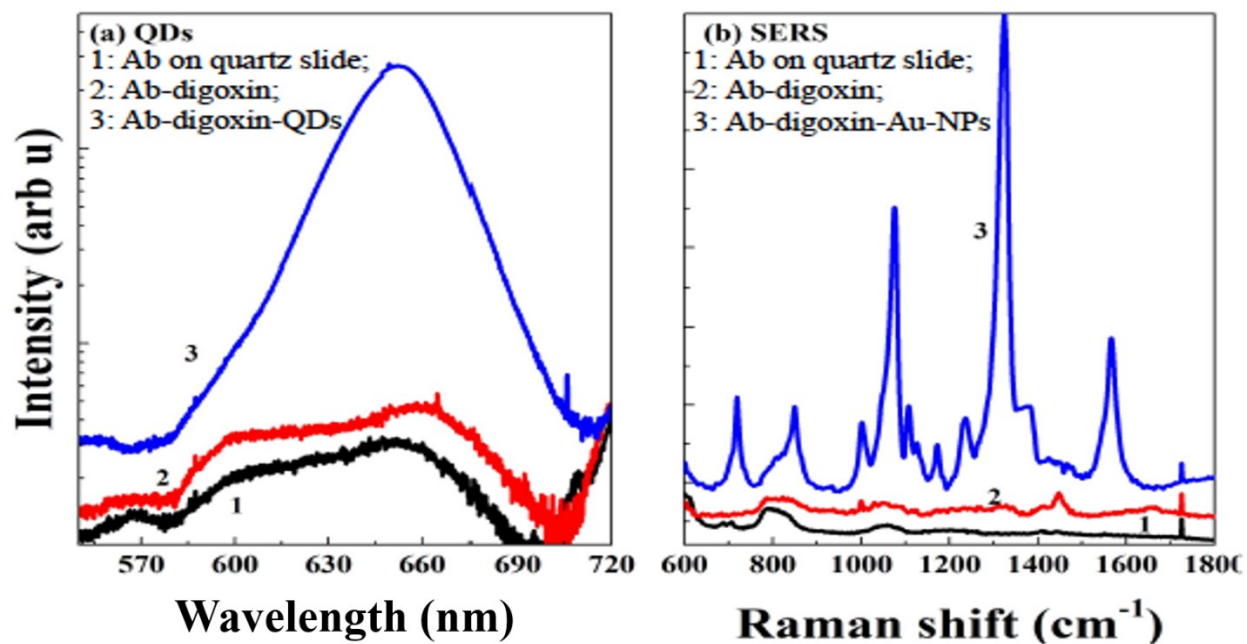

**Fig. S3.** On Chip Binding: PL and SERS spectra taken at each step of fabrication of ELISA chips on conjugation with digoxin drug with **a** QDs and **b** Au-NPs during various stages (spectrum 1: antibody on quartz slide; 2: Antibody conjugated to digoxin; and 3: Antibody attached to digoxin conjugated QDs (Au-NPs)).

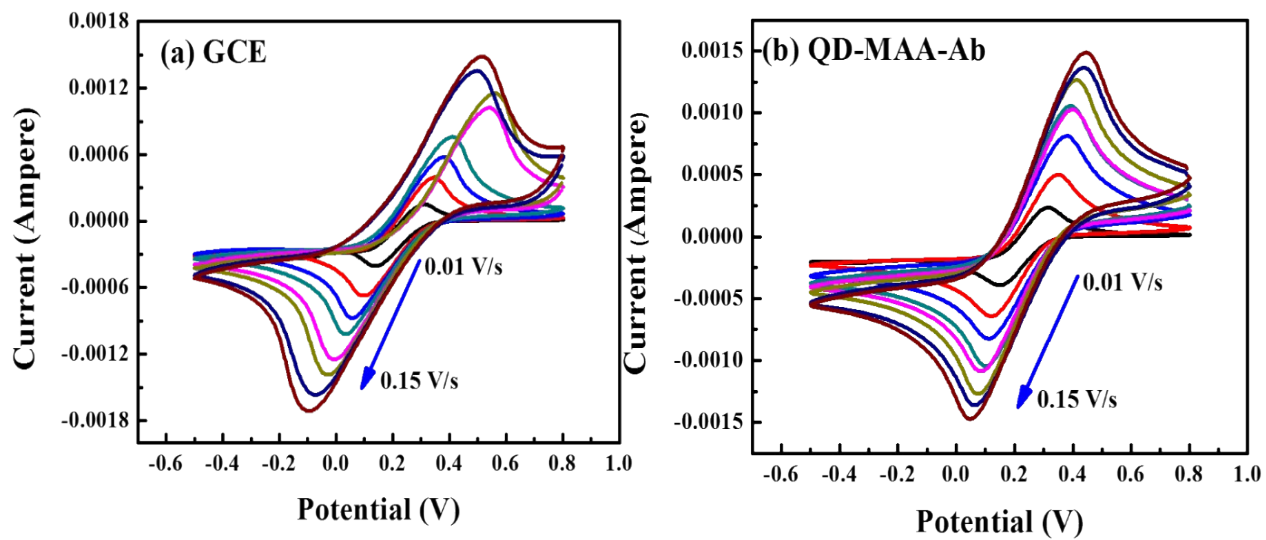

**Fig. S4.** CV graph showing variation in oxidation/reduction potentials and currents on varying the scan rate of **a** bare GC electrode **b** QD-MAA-Ab coated GC electrode.
